# Supplementary material for: A Quantitative In Vitro Potency Assay for Adeno-Associated Virus Vectors Encoding for the UGT1A1 Transgene
Source: PubMed Central journal article supplement — Mol Ther Methods Clin Dev. 2020 Jun 3;18:250–8. doi: 10.1016/j.omtm.2020.06.002 (PMC7327880; doi:10.1016/j.omtm.2020.06.002), 2020-06-03
Supplement: mmc1.pdf [file mmc1.pdf]

OMTM, Volume 18

## Supplemental Information

### **A Quantitative *In Vitro* Potency Assay**

### **for Adeno-Associated Virus Vectors**

### **Encoding for the *UGT1A1* Transgene**

**Sem J. Aronson, Robert S. Bakker, Sascha Moenis, Remco van Dijk, Giulia Bortolussi, Fanny Collaud, Xiaoxia Shi, Suzanne Duijst, Lysbeth ten Bloemendaal, Giuseppe Ronzitti, Andrés F. Muro, Federico Mingozi, Ulrich Beuers, and Piter J. Bosma**

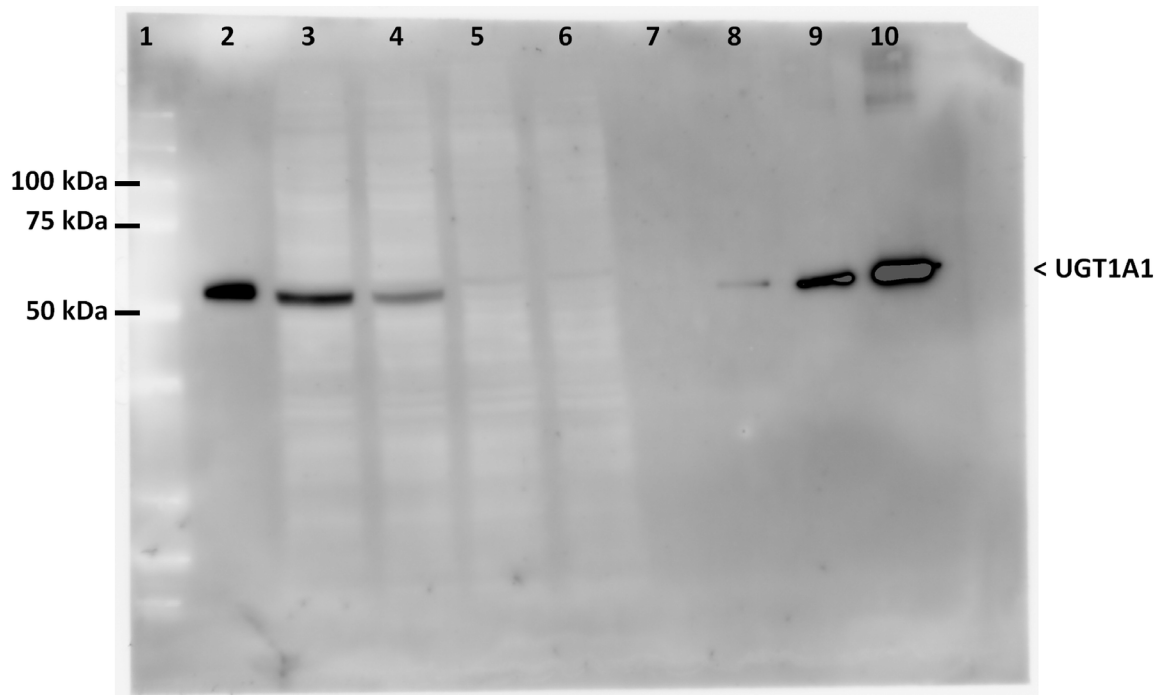

**Figure S1.** Western blot using anti UGT1 clone WP1.

1. BioRad precision plus protein marker, 2. HEK293-UGT1A1 (5  $\mu$ g), 3. Huh7 AAV-UGT1A1\* [*HEK-SUSP*] (50  $\mu$ g), 4. Huh7 AAV-UGT1A1\* [*BAC*] (50  $\mu$ g), 5. Huh7 AAV-UGT1A1\* [*CO1*] (50  $\mu$ g), 6. Huh7 parental (50  $\mu$ g), 7. UGT1A1 (5 ng), 8. UGT1A1 (20 ng), 9. UGT1A1 (50 ng), 10. UGT1A1 (100 ng).

\* $4.8 \times 10^4$  vg/seeded cell, [batch name], (amount of protein loaded)

| Gene            | Forward 5'-3'         | Reverse 5'-3'         |
|-----------------|-----------------------|-----------------------|
| UGT1A1<br>[WT]  | GACGCCTCGTTGTACATCAG  | CACGCTGCAGGAAAGAATC   |
| UGT1A1<br>[CO1] | GCCAGGAGTTCGAGGCCTAC  | GGTGTTGTTGGCCAGGTTGC  |
| UGT1A1<br>[CO2] | GCCAGGAGTTTGAGGCGTAC  | GGTGTTGTTTGCCAAATTGC  |
| hAAT            | TCGGTAAGTGCAGTGGAAGC  | GGAGCAAACAGGGGCTAAGT  |
| $\beta$ -actin  | AGCCATGTACGTAGCCATCCA | TCTCCGGAGTCCATCACAATG |

**Table S1.** Primers used for transgene detection in tissues- and mRNA expression analysis in tissues by real time PCR.
